# Supplementary material for: Progesterone vs. synthetic progestins and the risk of breast cancer: a systematic review and meta-analysis
Source: Springer Nature journal article supplement (doi:10.1186/s13643-016-0294-5), 2016-07-26
Supplement: MOESM2 [file 10521292]

## Supplemental file 1: Detailed Search Strategy

### Ovid

Database(s): Embase 1988 to 2013 Week 35, Ovid MEDLINE(R) In-Process & Other Non-Indexed Citations and Ovid MEDLINE(R) 1946 to Present, EBM Reviews - Cochrane Central Register of Controlled Trials July 2013, EBM Reviews - Cochrane Database of Systematic Reviews 2005 to July 2013

Search Strategy:

| # | Searches                                                                                                                                                                                                                                                                                                                                                                                                                                                                                                                                                                                                                                                                                                                                                                                                                                                                                                                                                                                                                                                                                                                                                                                                          | Results |
|---|-------------------------------------------------------------------------------------------------------------------------------------------------------------------------------------------------------------------------------------------------------------------------------------------------------------------------------------------------------------------------------------------------------------------------------------------------------------------------------------------------------------------------------------------------------------------------------------------------------------------------------------------------------------------------------------------------------------------------------------------------------------------------------------------------------------------------------------------------------------------------------------------------------------------------------------------------------------------------------------------------------------------------------------------------------------------------------------------------------------------------------------------------------------------------------------------------------------------|---------|
| 1 | exp Progesterone/                                                                                                                                                                                                                                                                                                                                                                                                                                                                                                                                                                                                                                                                                                                                                                                                                                                                                                                                                                                                                                                                                                                                                                                                 | 113552  |
| 2 | exp pregnane derivative/                                                                                                                                                                                                                                                                                                                                                                                                                                                                                                                                                                                                                                                                                                                                                                                                                                                                                                                                                                                                                                                                                                                                                                                          | 1699    |
| 3 | exp algestone/                                                                                                                                                                                                                                                                                                                                                                                                                                                                                                                                                                                                                                                                                                                                                                                                                                                                                                                                                                                                                                                                                                                                                                                                    | 234     |
| 4 | exp gestagen/                                                                                                                                                                                                                                                                                                                                                                                                                                                                                                                                                                                                                                                                                                                                                                                                                                                                                                                                                                                                                                                                                                                                                                                                     | 95689   |
| 5 | exp progestins/<br>(progesterone* or pregnenedione* or Algestone* or Dihydroprogesterone* or hydroprogesterone* or Hydroxyprogesterone* or Medroxyprogesterone* or alphasonone* or alfasone* or methylprogesterone* or methylhydroxyprogesterone* or "adgyn medro*" or didrogesteron or agolutin or akrolutin or colprosterone or corlut* or corlute or corpomone or "corpus luteum hormone*" or crinone or cyclogest or depoprogesterone* or endometrin or esolut or estima or evapause or flavolutan or fologenon or gepromi or geslutin or gesterol or gestion or gestone or gestormone or gladucorpin or glanducorpin or glanesting or gonadyl or gynlutin or gynolutin or hormoflaveine or hormoluton or "lipo lutin" or "lucorteam sol" or lucorteamsol or lugesteron or luteinique or luteocyclin or luteodyn or luteogan or luteohormone or luteol or luteomersin or luteoris or luteosan or luteostab or luteosterone or luteovis or lutex or lutidon or lutin or lutine or lutocyclin or lutocyclin or lutoform or lutogyl or "lutogynestryl fuerte" or lutren or lutromone or                                                                                                                          | 158811  |
| 6 | macrogestin or mafel or membrettes or nalutron or naturogest or neolutin or "oophormin luteum" or primolut or prochieve or progeffik or progekan or progenin* or progering or progest or progestan or progestasert or progesteroid or progesterol or progesteron or progestin* or progestogel or progestol or progestone or progestronaq or prolidon or proluton or prometrium or prontogest or repogest or silestrus or syngenstrone or syngesterone or ultrogestan or uterogestan or utrogestan or "pregnane derivative*" or norpregnadienes or norpregnanes or norpregnatrienes or norpregnenes or pregnadienediols or pregnadienes or pregnadienetriols or pregnanes or pregnatrienes or pregnenediones or pregnenes or gestagen or gestogen or progestagen* or progestational or progestative or progestogen* or hydroxypregnenolone or dihydroxypregn or allylestrenol or altrenogest or chlormadinone or cyproterone or demegestone or deposiston or desogestrel or dienogest or dimethisterone or drospirenone or dydrogesterone or elcometrine or eltanolone or levonorgestrel or nomegestrol or norethisterone or norgestimate or norgestrel or ethisterone or etonogestrel or "etynodiol diacetate" or | 279173  |

gestodene or lynestrenol or megestrol or norelgestromin or etynodiol or flugestone or flumedroxone or gestaclone or gestodene or gestonorone or gestrinone or leuprorelin or levonorgestrel or lynestrenol or medrogestone or megestrol or melengestrol or methylestrenolone or nomegestrol or "non ovlon" or norelgestromin or noretynodrel or norgestimate or norgestomet or norgestrienone or osaterone or pregnanediol or pregnanediolone or pregnanetriol or prempak or proligestone or promegestone or segesterone or sepranolone or tanaproget or tetrahydroprogesterone or tosagestin or trimegestone or trisequens).mp. [mp=ti, ab, sh, hw, tn, ot, dm, mf, dv, kw, nm, kf, ps, rs, ui, tx, ct]

7 or/1-6 279921

8 exp \*Heart Diseases/ 1356038

9 (coronary or heart or myocardi\* or cardiac or cardiopath\*).ti. 1216945

10 exp \*Breast Neoplasms/ 389231

11 ((breast or mammary or mammaries) adj3 (cancer\* or tumor\* or tumour\* or neoplasm\* or carcinoma\*)).ti. 319709

12 or/8-11 2282904

13 exp Postmenopause/ 63639

(postmenopaus\* or "post-menopaus\*" or ("after" adj3 menopaus\*) or ("following"

14 adj3 menopaus\*)).mp. [mp=ti, ab, sh, hw, tn, ot, dm, mf, dv, kw, nm, kf, ps, rs, ui, tx, ct] 137660

15 13 or 14 137660

16 7 and 12 and 15 6674

17 exp controlled study/ 4218360

18 exp randomized controlled trial/ 723013

19 ((control\$ or randomized) adj2 (study or studies or trial or trials)).mp. [mp=ti, ab, sh, hw, tn, ot, dm, mf, dv, kw, nm, kf, ps, rs, ui, tx, ct] 5464633

20 meta analysis/ 125634

21 meta-analys\$.mp. 203300

22 exp "systematic review"/ 63637

23 (systematic\* adj review\$).mp. 156216

24 exp Cohort Studies/ 1605366

25 exp longitudinal study/ 1026986

26 exp retrospective study/ 816646

27 exp prospective study/ 670721

28 exp comparative study/ 2492723

29 exp clinical trial/ 1728244

30 exp cross-sectional study/ 283515

31 crossover procedure/ 38209

32 exp cross-over studies/ 97444

33 multivariate analysis/ 183723

|    |                                                                                                                                                                                                                                                                                                                                                                                                                                                                                                                                 |          |
|----|---------------------------------------------------------------------------------------------------------------------------------------------------------------------------------------------------------------------------------------------------------------------------------------------------------------------------------------------------------------------------------------------------------------------------------------------------------------------------------------------------------------------------------|----------|
| 34 | ((clinical or comparative or cohort or longitudinal or retrospective or prospective or concurrent or "cross-sectional" or crossover or "cross-over") adj (study or studies or survey or surveys or analysis or analyses or trial or trials)).mp.                                                                                                                                                                                                                                                                                | 7178988  |
| 35 | ("crossover procedure" or "cross-over procedure" or "multivariate analys*").mp.<br>[mp=ti, ab, sh, hw, tn, ot, dm, mf, dv, kw, nm, kf, ps, rs, ui, tx, ct]                                                                                                                                                                                                                                                                                                                                                                      | 375337   |
| 36 | ("case control study" or "case control studies").mp.                                                                                                                                                                                                                                                                                                                                                                                                                                                                            | 322722   |
| 37 | exp case control study/                                                                                                                                                                                                                                                                                                                                                                                                                                                                                                         | 751329   |
| 38 | exp Randomized Controlled Trials as Topic/                                                                                                                                                                                                                                                                                                                                                                                                                                                                                      | 146103   |
| 39 | or/17-38                                                                                                                                                                                                                                                                                                                                                                                                                                                                                                                        | 11093295 |
| 40 | 16 and 39                                                                                                                                                                                                                                                                                                                                                                                                                                                                                                                       | 4832     |
| 41 | from 16 keep 3682-6139                                                                                                                                                                                                                                                                                                                                                                                                                                                                                                          | 2458     |
| 42 | limit 41 to (clinical trial, all or clinical trial, phase i or clinical trial, phase ii or clinical trial, phase iii or clinical trial, phase iv or clinical trial or comparative study or controlled clinical trial or evaluation studies or guideline or meta analysis or multicenter study or practice guideline or randomized controlled trial or systematic reviews) [Limit not valid in Embase,CCTR,CDSR; records were retained]                                                                                          | 855      |
| 43 | 40 or 42                                                                                                                                                                                                                                                                                                                                                                                                                                                                                                                        | 4851     |
| 44 | limit 43 to (book or book series or editorial or erratum or letter or note or addresses or autobiography or bibliography or biography or comment or dictionary or directory or interactive tutorial or interview or lectures or legal cases or legislation or news or newspaper article or overall or patient education handout or periodical index or portraits or published erratum or video-audio media or webcasts) [Limit not valid in Embase,Ovid MEDLINE(R),Ovid MEDLINE(R) In-Process,CCTR,CDSR; records were retained] | 229      |
| 45 | 43 not 44                                                                                                                                                                                                                                                                                                                                                                                                                                                                                                                       | 4622     |
| 46 | from 16 keep 6140-6674                                                                                                                                                                                                                                                                                                                                                                                                                                                                                                          | 535      |
| 47 | 45 or 46                                                                                                                                                                                                                                                                                                                                                                                                                                                                                                                        | 4791     |
| 48 | animals/ not humans/                                                                                                                                                                                                                                                                                                                                                                                                                                                                                                            | 4637755  |
| 49 | 47 not 48                                                                                                                                                                                                                                                                                                                                                                                                                                                                                                                       | 4776     |
| 50 | limit 49 to female [Limit not valid in CCTR,CDSR; records were retained]                                                                                                                                                                                                                                                                                                                                                                                                                                                        | 4107     |
| 51 | 49 and (female* or women or woman).mp. [mp=ti, ot, ab, sh, hw, kw, tn, dm, mf, dv, nm, kf, ps, rs, an, ui, tx, ct]                                                                                                                                                                                                                                                                                                                                                                                                              | 4501     |
| 52 | 50 or 51                                                                                                                                                                                                                                                                                                                                                                                                                                                                                                                        | 4544     |
| 53 | remove duplicates from 52                                                                                                                                                                                                                                                                                                                                                                                                                                                                                                       | 2921     |



- 3 TITLE-ABS-KEY(postmenopaus\* or "post-menopaus\*" or ("after" W/3 menopaus\*) or ("following" W/3 menopaus\*))
- 4 TITLE-ABS-KEY((meta W/1 analys\*) OR (systematic\* W/2 review\*) OR (control\* W/2 stud\*) OR (control\* W/2 trial\*) OR (randomized W/2 stud\*) OR (randomized W/2 trial\*) or "comparative stud\*" OR "comparative survey\*" OR "comparative analys\*" OR "cohort stud\*" OR "cohort survey\*" OR "cohort analys\*" OR "longitudinal stud\*" OR "longitudinal survey\*" OR "longitudinal analys\*" OR "retrospective stud\*" OR "retrospective survey\*" OR "retrospective analys\*" or "prospective stud\*" OR "prospective survey\*" OR "prospective analys\*" or "concurrent stud\*" OR "concurrent survey\*" OR "concurrent analys\*" or "clinical stud\*" OR "clinical trial\*" or "cross-sectional stud\*" or "cross-sectional analys\*" or "cross-over stud\*" or "cross-over analys\*" or "cross-over procedure" or "crossover stud\*" or "crossover analys\*" or "crossover procedure" or "multivariate analys\*" or "case control study" or "case control studies")
- 5 1 and 2 and 3 and 4
- 6 PMID(0\*) OR PMID(1\*) OR PMID(2\*) OR PMID(3\*) OR PMID(4\*) OR PMID(5\*) OR PMID(6\*) OR PMID(7\*) OR PMID(8\*) OR PMID(9\*)
- 7 5 and not 6
- 8 DOCTYPE(le) OR DOCTYPE(ed) OR DOCTYPE(bk) OR DOCTYPE(er) OR DOCTYPE(no) OR DOCTYPE(sh)
- 9 7 and not 8
